# Supplementary material
Source: PubMed Central journal article supplement (PMC3325730)
Supplement: 1203094109_pnas.201203094SI.pdf [file 1203094109_pnas.201203094SI.pdf]

# Supporting Information

Lu et al. 10.1073/pnas.1203094109

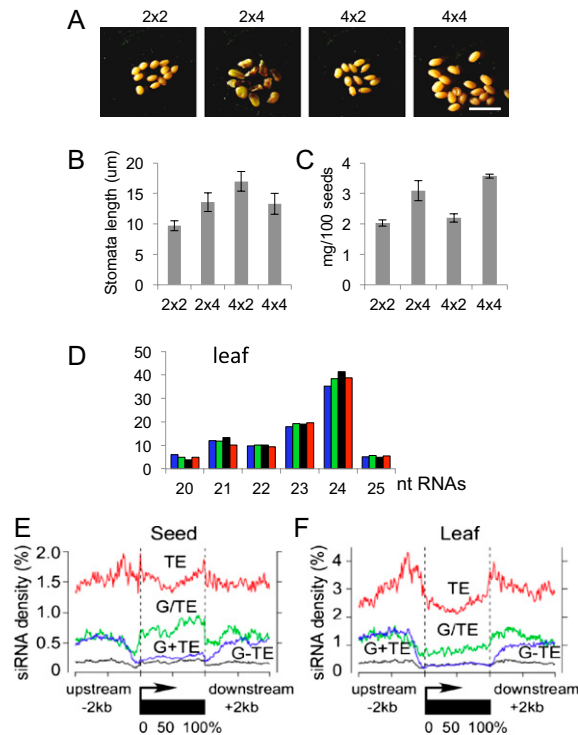

**Fig. S1.** Seed size variation in ploidy series (Col-0) and small RNA distribution in leaves. (A) Seed size variation in ploidy series of Col. Note that seed abortion in  $2 \times 4$  triploids in Col is related to maternal expression of *TTG2* during late stage of seed development (1) and possibly other unknown genes. (Scale bar, 1 mm.) (B) Quantification of stomata sizes in ploidy series. (C) Quantification of dry seed weight in ploidy series. (D) Distribution of small RNAs in leaves. (E and F) siRNA densities in TE genes (TE, red), genes containing TEs in 5' upstream (2 kb) and 3' downstream (2 kb) regions (G+TE, blue), and TE-overlapped genes (G/TE, green), and TE-free genes (G-TE, black) in seeds (E) and leaves (F).

1. Dilkes BP, et al. (2008) The maternally expressed WRKY transcription factor *TTG2* controls lethality in interploidy crosses of *Arabidopsis*. *PLoS Biol* 6:2707–2720.



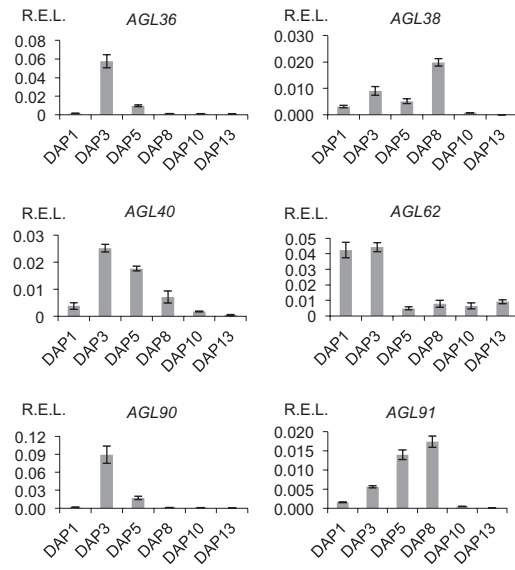

**Fig. S4.** qRT-PCR analysis (REL, relative expression levels) of siRNA-related *AGL* genes in different stages of developing siliques.





**Table S1. Sequence reads of small RNA libraries from *Arabidopsis thaliana* reciprocal interploidy crosses and their parents (rosette leaves)**

| Genomic feature    | 2L (%)         | 4L (%)         | 2 × 4L (%)     | 4 × 2L (%)     |
|--------------------|----------------|----------------|----------------|----------------|
| All reads          | 8,929,273      | 3,165,346      | 11,610,370     | 11,886,105     |
| Filtered           | 4,257,442 (48) | 895,774 (28)   | 3,072,403 (26) | 4,697,603 (40) |
| Gene               | 896,187 (10)   | 360,142 (11)   | 1,414,223 (12) | 1,153,949 (10) |
| Transposon         | 1,297,503 (15) | 543,352 (17)   | 2,606,896 (22) | 2,410,799 (20) |
| miRNA              | 890,159 (10)   | 829,203 (26)   | 2,479,074 (21) | 1,030,473 (9)  |
| ta-siRNA           | 16,333 (0.2)   | 7,075 (0.2)    | 46,154 (0.4)   | 22,157 (0.2)   |
| Intergenic regions | 1,571,649 (18) | 529,800 (17)   | 1,991,620 (17) | 2,571,124 (22) |
| Total small RNA    | 4,671,831 (52) | 2,269,572 (72) | 8,537,967 (74) | 7,188,502 (60) |

Rosette leaves in diploid (2L); tetraploids (4L), paternal-excess triploids (2 × 4L), and maternal-excess triploids (4 × 2L); all reads, reads perfectly match the genome; filtered, number of reads that match chloroplast, mitochondrial genomes, and structural noncoding RNAs, including rRNA, tRNA, snoRNA, and snRNA.

**Table S2. Sequence reads of small RNA libraries from *Arabidopsis thaliana* reciprocal interploidy crosses and their parents (seeds)**

| Genomic feature    | 2S (%)          | 4S (%)          | 2 × 4S (%)      | 4 × 2S (%)     |
|--------------------|-----------------|-----------------|-----------------|----------------|
| All reads          | 12,082,171      | 11,642,856      | 12,705,829      | 11,516,592     |
| Filtered           | 778,465 (6)     | 1,274,150 (11)  | 2,637,149 (20)  | 1,742,706 (15) |
| Gene               | 2,330,912 (19)  | 2,039,493 (18)  | 1,729,226 (13)  | 2,029,347 (18) |
| Transposon         | 2,069,358 (17)  | 1,740,812 (15)  | 1,398,336 (11)  | 1,814,304 (16) |
| miRNA              | 1,227,444 (10)  | 1,647,975 (14)  | 2,421,478 (19)  | 668,594 (6)    |
| ta-siRNA           | 469 (0.004)     | 550 (0.004)     | 395 (0.003)     | 688 (0.006)    |
| Intergenic regions | 5,675,523 (47)  | 4,939,876 (42)  | 4,519,245 (36)  | 5,260,953 (46) |
| Total small RNA    | 11,303,706 (94) | 10,368,706 (89) | 10,068,680 (79) | 9,773,886 (85) |

Dissected seeds at 6 d after pollination (DAP); seeds in diploid (2S), tetraploids (4S), paternal-excess triploid (2 × 4S), and maternal-excess triploid (4 × 2S); reads classifications are as in Table S1.

**Table S3. A list of MADS box genes that possess more than 10 reads from transcribed regions in at least one line**

| Locus | Gene name | 2 × 2 | 4 × 4 | 2 × 4 | 4 × 2 | SS, % | P value | TE | Type |
|-------|-----------|-------|-------|-------|-------|-------|---------|----|------|
| AGL91 | AT3G66656 | 15029 | 17843 | 10688 | 22982 | 89    | 0.0079  | 3  | I    |
| AGL40 | AT4G36590 | 7941  | 9395  | 4834  | 11665 | 44    | 0.0092  | 4  | I    |
| AGL33 | AT2G26320 | 580   | 797   | 452   | 1076  | 67    | 0.0540  | 6  | I    |
| AGL36 | AT5G26650 | 980   | 886   | 510   | 1034  | 30    | 0.0009  | 6  | I    |
| AGL86 | AT1G31630 | 1000  | 950   | 1052  | 835   | 40    | 0.0200  | 2  | I    |
| AGL62 | AT5G60440 | 1121  | 530   | 548   | 820   | 46    | 0.0393  | 5  | I    |
| AGL90 | AT5G27960 | 252   | 252   | 122   | 311   | 36    | 0.0495  | 5  | I    |
| AGL34 | AT5G26580 | 82    | 75    | 39    | 98    | 66    | 0.0849  | 5  | I    |
| AGL87 | AT1G22590 | 117   | 100   | 5     | 84    | 100   | 0.2453  | 5  | I    |
| AGL92 | AT1G31640 | 72    | 43    | 73    | 61    | 54    | 0.0712  | 5  | I    |
| AGL23 | AT1G65360 | 84    | 55    | 40    | 54    | 95    | 0.2088  | 3  | I    |
| AGL28 | AT1G01530 | 28    | 12    | 12    | 23    | 13    | 0.0893  | 3  | I    |
| AGL84 | AT5G49420 | 11    | 9     | 7     | 15    | 83    | 0.0305  | 1  | I    |
| AGL42 | AT5G62165 | 22    | 22    | 42    | 34    | 29    | 0.1165  | 0  | II   |
| AGL66 | AT1G77980 | 32    | 12    | 10    | 13    | 26    | 0.0456  | 3  | II   |
| AGL14 | AT4G11880 | 7     | 29    | 4     | 12    | 68    | 0.3756  | 1  | II   |
| AGL12 | AT1G71692 | 20    | 11    | 24    | 10    | 16    | 0.2452  | 0  | II   |
| AGL11 | AT4G09960 | 10    | 16    | 13    | 6     | 23    | 0.3756  | 4  | II   |

The 24-nt reads were normalized per 10 million; locus, the unique *AGI* identifier; %, percentage of reads from the sense strand; P values, probability of a locus that generates secondary siRNAs by chance; TE, number of transposons in the locus and ±2-kb regions.

**Table S4. 5' and 3' adapters**

| Adapter    | Sample          | Sequence                                   |
|------------|-----------------|--------------------------------------------|
| 5' adapter | 2 × 2 seed/leaf | 5'-GUUCAGAGUUCUACAGUCCGACGAUCA-3'          |
|            | 4 × 4 seed/leaf | 5'-GUUCAGAGUUCUACAGUCCGACGAU <u>C</u> T-3' |
|            | 2 × 4 seed/leaf | 5'-GUUCAGAGUUCUACAGUCCGACGAU <u>C</u> C-3' |
|            | 4 × 2 seed/leaf | 5'-GUUCAGAGUUCUACAGUCCGACGAU <u>C</u> G-3' |
| 3' adapter |                 | 5' P-UCGUAUGCCGUCUUCUGCUUGIdT              |

The bases that were used as a barcode in each 5' adaptor are underlined.

**Table S5. qPCR primers**

| Gene   | Forward primer sequence  | Reverse primer sequence  |
|--------|--------------------------|--------------------------|
| AGL23  | TGACCACTTTCGAGGGTGTGTG   | TTACTCCACCACTCCTCAGCGTTT |
| AGL28  | ACTTGACCACTCTTTAGGGCGTG  | ACCACCTCTCAGCGTCTTGTTC   |
| AGL33  | TTGTTTCTCCACCGAGAAGCCT   | TCACACCTCTCTCCCGTCTTGT   |
| AGL34  | GATGCGAATGCAACTGCGGTAAC  | ACAAGGTGTTGAAACGGTCGATGC |
| AGL36  | ATGAATCATGTTGGAGGGCG     | GCAGTTTCCGTCCACGAAAG     |
| AGL40  | GCCATTGTCCATCATCAGAACA   | CGGACGGGTTTCAACAAGTT     |
| AGL42  | GATCGAACGCTACCGCAAGT     | TCGTGATTGCTGGTTTCATGA    |
| AGL62  | AATTGGTGGGAAGATCCCGT     | CCCCTCGAGTTGAGATAACGC    |
| AGL84  | ACCAAACGCCGTGAAGGTCTCTA  | AGACAACGGCATCAACAGAGGAG  |
| AGL86  | TGAGCATCAGTATGGTGCAAGGG  | TGAAGCGGAGGAGGAAAGGAAGA  |
| AGL87  | ACCGTTCTATGTGGTTTACCCGCT | TGCTTCTACCGGAAGTTCGCTT   |
| AGL90  | ACCAGCCGTTGATCTTGCTT     | ACATCGGTGGTTGAAGGCAT     |
| AGL91  | AACAAACCGTATTCCTTCGGG    | CCGTTCTGCAATCACATCAAA    |
| AGL92  | TCATGAGACTTCTTGCGGGACC   | TGAAGGTCCCTTGACCATACTGT  |
| FIS2   | TCTTGCCCATTTTGCTTGATT    | AAGTTGCAAGCCCTCGTGAC     |
| FWA    | AGCCTGGTGAGCTAACTGGG     | GCCAAACAGAAGTGGATGCAC    |
| MEA    | GTTTGGATGATCTGGTCGTGC    | CCACTTCGAGGTA            |
| PHE1   | GTGGTGTGACGCATGTGC       | CCTGGATCGAGTTGTACGGG     |
| GRF1   | GGATTAGGCGTCAACACCGA     | GTTATTCGCTTTTTCCCGGG     |
| GRF3   | TGAGGCCCTTCTTTGACGAT     | TGTCAGCTTCTTGGAGCGAA     |
| GRF4   | CACCAACCTTCTTGGTATTGGG   | CCCTGGCTCAGGATCCATT      |
| NRPD1A | GCGGGTGAGCTGTACTTGA      | CTTTTGCCCGATCTCCATA      |

**Table S6. Probe sequences**

| Gene   | Sequence                                                                                                                                                                                        |
|--------|-------------------------------------------------------------------------------------------------------------------------------------------------------------------------------------------------|
| miR166 | GGG GAA TGA AGC CTG GTC CGA                                                                                                                                                                     |
| miR172 | ATG CAG CAT CAT CAA GAT TCT                                                                                                                                                                     |
| miR396 | AGTTCAAGAAAGCTGTGGAA                                                                                                                                                                            |
| miR832 | TTTCGATTCCCGATCCAGCA                                                                                                                                                                            |
| AGL91  | TTGCCTCTACTATAGCCTGAT;<br>ATTGCCTCTACTATAGCCTGA;<br>TCTTAAACCGTTCTGCAATCACAT;<br>GTTGAGGCGTTTACATATCTTCT;<br>CTTAAACCGTTCTGCAATCACATC;<br>CTATTGCCTCTACTATAGCCTGAT;<br>TTGCCTCTACTATAGCCTGATGTT |
| AGL40  | ATACCAGTTTCTACTTGTCTCT;<br>ATGCCAATTCTATGTCTATAACTT;<br>TTCTGCCATTGTCCATCATCA;<br>AACCATAATTCTGCCATTGTCCAT;<br>TTCATCGCTTTTTCGAATCCTA;<br>TGACGACCTTGGTACTTCT                                   |
| U6     | GCTAATCTTCTGTATCGTTCC                                                                                                                                                                           |

## Other Supporting Information Files

[Dataset S1 \(XLS\)](#)

[Dataset S2 \(XLS\)](#)

[Dataset S3 \(XLS\)](#)

[Dataset S4 \(XLS\)](#)
